# Supplementary material
Source: publisher figshare collection journal article supplement (https://geolsoc.figshare.com/articles/dataset/_/3452879)
Supplement: Supplementary file 1 [file 1]

## IGCP512 – Hoffman & Halverson – Mackenzie Mountains – Data Supplement 2

Upper Sayunei Formation (Rapitan Group) iron formation, Hayhook Lake, NT, Canada

Sample location: 63° 34' 31" N; 127° 05' 30" W

**Table 1.** Iron isotope compositions, mineralogy, and iron concentrations for Rapitan BIF samples. Iron concentrations were measured by ICP-MS and MC-ICPMS. Minerals are abbreviated as follows: hem = hematite, qtz = quartz, chl = chlorite, ill = illite, and cal = calcite. Iron isotope data are reported in per mil (‰) notation relative to the IRMM-14 standard ( $\delta_{57}\text{Fe} = 1000 \text{ ‰} \sim [({}^{57}\text{Fe}/{}^{54}\text{Fe})_{\text{sample}}/({}^{57}\text{Fe}/{}^{54}\text{Fe})_{\text{IRMM-14}}]$ ). These data were acquired variably from a 1M CH<sub>2</sub>COOH or 6 M HCl leachate (sequential dissolution) of the samples or on a bulk rock dissolution (HCl + HF + HNO<sub>3</sub>); since the bulk of iron in these sample occurs as hematite, the latter two methods yielded nearly identical values. Given the large isotopic variations observed between the individual measurements, each sample was analyzed only three times (6 being the normal practice at LMTG where a high level of precision is required). Standard errors (2se) were calculated using the t-correcting factor tabulated in Platzner (1997).

Table 2. Summary of trace element data on Rapitan BIF (bulk rock) samples. The Ce-anomaly is calculated (after Elderfield and Greaves, 1982) as  $\text{Ce}/\text{Ce}^* = \log[\text{Ce}_N/(0.67\text{La}_N+0.33\text{Pr}_N)]$ , where the subscript N denotes normalization against mean chondritic values (McLennan, 1989). The Eu-anomaly (after McLennan, 1989) is calculated as  $\text{Eu}_N/(\text{Sm}_N \bullet \text{Gd}_N)^{0.5}$ , again normalized against chondrite.

**Table 2.** Summary of trace element data on Rapitan BIF (bulk rock) samples. The Ce-anomaly is calculated (after Elderfield and Greaves, 1982) as  $\text{Ce}/\text{Ce}^* = \log[\text{Ce}_N/(0.67\text{La}_N+0.33\text{Pr}_N)]$ , where the subscript N denotes normalization against mean chondritic values (McLennan, 1989). The Eu-anomaly (after McLennan, 1989) is calculated as  $\text{Eu}_N/(\text{Sm}_N \bullet \text{Gd}_N)^{0.5}$ , again normalized against chondrite.

Table 1. (Halverson et al.)

| Sample   | Strat.<br>Height<br>(m) | Lithology              | Mineralogy              | Analyzed<br>Fraction | [Fe] ppm | $\delta^{57}\text{Fe}$ | 2se   | $\delta^{56}\text{Fe}$ | 2se   |
|----------|-------------------------|------------------------|-------------------------|----------------------|----------|------------------------|-------|------------------------|-------|
| G22.5.4  | 29.5                    | ferruginous silt       | ill+qtz+chl+hem         | 1N Acetic            | 1158     | -                      | -     | -                      | -     |
| G22.5.4  |                         |                        |                         | HCL                  | 58183    | 0.128                  | 0.029 | 0.083                  | 0.010 |
| G22.5.4  |                         |                        |                         | Insol. Res.          | 11529    | 1.201                  | 0.056 | 0.816                  | 0.038 |
| G22.13.5 | 21.4                    | ferruginous diamictite |                         | bulk rock            | 54805    | 0.673                  | 0.138 | 0.442                  | 0.081 |
| G22.19.8 | 15.1                    | hematitic silt         |                         | HCL                  | 119951   | 0.944                  | 0.046 | 0.635                  | 0.025 |
|          |                         |                        |                         | bulk rock            | 263262   | 0.967                  | 0.108 | 0.659                  | 0.078 |
| G22.21.1 | 13.8                    | hematitic jaspilite    |                         | HCL                  | 123127   | 0.858                  | 0.021 | 0.575                  | 0.022 |
| G22.21.3 | 13.6                    | hematitic jaspilite    | qtz+hem+cal             | HCL                  | 121144   | 1.196                  | 0.089 | 0.821                  | 0.076 |
| G22.21.3 |                         |                        |                         | bulk rock            | 172368   | 1.243                  | 0.147 | 0.833                  | 0.094 |
| G22.22.7 | 12.2                    | hematitic mud          |                         | HCL                  | 192901   | 0.591                  | 0.079 | 0.412                  | 0.036 |
| G22.22.7 |                         |                        |                         | bulk rock            | 240011   | 0.517                  | 0.162 | 0.352                  | 0.095 |
| G22.24.8 | 10.1                    | hematitic jaspilite    | qtz+hem+cal             | HCL                  | 123988   | 0.652                  | 0.011 | 0.441                  | 0.022 |
|          |                         |                        |                         | bulk rock            | 153488   | 0.647                  | 0.131 | 0.443                  | 0.069 |
| G22.26.1 | 8.8                     | hematitic mud          | hem+chl+qtz+fel         | HCL                  | 440934   | -0.268                 | 0.049 | -0.182                 | 0.021 |
|          |                         |                        |                         | bulk rock            | 543755   | -0.445                 | 0.045 | -0.303                 | 0.024 |
| G22.28   | 6.9                     | hematitic mud          |                         | HCL                  | 138342   | -0.201                 | 0.058 | -0.129                 | 0.048 |
|          |                         |                        |                         | bulk rock            | 178986   | -0.194                 | 0.078 | -0.123                 | 0.029 |
| G22.29.8 | 5.1                     | hematitic mud          | qtz+ill+hem+chl         | HCL                  | 134868   | -0.400                 | 0.073 | -                      | -     |
| G22.32.9 | 2                       | hematitic mud          | qtz+ill+chl+hem         | 1N Acetic            | 1005     | -0.942                 | 0.059 | -0.657                 | 0.046 |
|          |                         |                        |                         | HCL                  | 104757   | -0.426                 | 0.026 | -0.283                 | 0.019 |
|          |                         |                        |                         | Insol. res.          | 1964     | 0.148                  | 0.091 | 0.088                  | 0.038 |
|          |                         |                        |                         | bulk rock            | 112805   | -0.418                 | 0.077 | -0.276                 | 0.034 |
| G22.34.7 | 0.2                     | hematitic silt         | qtz+fel+chl+hem<br>+cal | 1N Acetic            | 690      | -0.851                 | 0.091 | -0.634                 | 0.041 |
|          |                         |                        |                         | HCL                  | 126205   | -0.650                 | 0.038 | -0.431                 | 0.032 |
|          |                         |                        |                         | Insol. Res.          | 2857     | -0.370                 | 0.127 | -0.543                 | 0.081 |
|          |                         |                        |                         | bulk rock            | 153634   | -0.789                 | 0.133 | -0.543                 | 0.081 |

Table 2 (Halverson et al.)

| sample     | G22.34.7 | G22.32.9 | G22.29.8 | G22.28 | G22.26.1 | G22.24.8 | G22.22.7 | G22.21.3 | G22.21.1 | G22.19.8 | G22.13.5 | G22.5.4 | JA-2   | JB-3   |
|------------|----------|----------|----------|--------|----------|----------|----------|----------|----------|----------|----------|---------|--------|--------|
| height (m) | 0.2      | 2        | 5.1      | 6.9    | 8.8      | 10.1     | 12.2     | 13.6     | 13.8     | 15.1     | 21.4     | 29.5    | -      | -      |
| Sc         | 10       | 7.7      | 18       | 8.7    | 9.9      | 3.7      | 7.8      | 1.8      | 1.9      | 12       | 14       | 20      | 16     | 29     |
| Ti         | 2794     | 1120     | 5358     | 2861   | 1074     | 121      | 1986     | 136      | 85       | 4702     | 3646     | 6618    | 3413   | 8252   |
| V          | 105      | 91       | 98       | 87     | 183      | 30       | 75       | 24       | 17       | 145      | 162      | 221     | 123    | 428    |
| Cr         | 34       | 20       | 39       | 38     | 20       | 3.7      | 30       | 3.3      | 3.5      | 65       | 58       | 95      | 376    | 63     |
| Mn         | 7149     | 16316    | 4062     | 3276   | 635      | 369      | 896      | 303      | 178      | 557      | 524      | 329     | 710    | 1304   |
| Co         | 67.6     | 49.5     | 21.9     | 23.2   | 5.6      | 1.0      | 12.4     | 1.1      | 0.5      | 17.5     | 12.9     | 23.4    | 24.4   | 29.5   |
| Ni         | 40.8     | 27.2     | 24.1     | 29.8   | 13.9     | 3.5      | 23.1     | 3.3      | 2.2      | 28.0     | 27.5     | 50.6    | 114    | 31.3   |
| Cu         | 20.6     | 33.8     | 62.4     | 62.1   | 24.2     | 64.6     | 68.3     | 49.6     | 77.0     | 30.5     | 112      | 75.2    | 26.1   | 182    |
| Zn         | 94.7     | 52.2     | 50.2     | 65.9   | 23.9     | 5.8      | 60.3     | 5.8      | 4.5      | 97.5     | 74.4     | 113     | 74.4   | 110    |
| Ga         | 38.1     | 11.6     | 34.8     | 18.3   | 11.5     | 11.1     | 23.4     | 3.0      | 44.3     | 20.3     | 20.7     | 64.4    | 62.1   | 53.6   |
| Ge         | 1.5      | 1.0      | 3.1      | 1.6    | 2.5      | 2.3      | 2.6      | 2.5      | 3.6      | 4.8      | 4.3      | 5.6     | 1.3    | 1.6    |
| As         | 15.3     | 6.8      | 9.4      | 10.2   | 42.3     | 8.8      | 7.4      | 5.4      | 6.4      | 3.8      | 3.8      | 3.0     | 1.1    | 1.8    |
| Se         | 0.5      | 1.3      | 1.8      | 1.1    | 0.7      | 0.3      | 1.4      | 0.4      | 0.5      | 3.0      | 4.8      | 2.1     | 0.7    | 0.8    |
| Rb         | 16.1     | 9.5      | 42.6     | 10.2   | 3.9      | 3.1      | 23.2     | 0.7      | 2.1      | 19.3     | 33.5     | 177     | 73.2   | 14.9   |
| Sr         | 86       | 236      | 146      | 77.4   | 30.8     | 21.8     | 42.8     | 28.0     | 36.5     | 32.0     | 74.7     | 29.9    | 229    | 402    |
| Y          | 16.3     | 13.6     | 24.9     | 13.2   | 23.0     | 8.0      | 18.3     | 4.6      | 6.6      | 11.0     | 14.4     | 27.0    | 13.6   | 20.6   |
| Zr         | 40.4     | 11.4     | 34.9     | 15.2   | 28.3     | 7.9      | 11.1     | 5.6      | 3.4      | 32.9     | 21.2     | 81.1    | 147    | 120    |
| Nb         | 54.8     | 27.6     | 103      | 39.4   | 34.0     | 6.6      | 38.4     | 5.7      | 3.8      | 61.4     | 70.5     | 180     | 64.9   | 17.1   |
| Mo         | 2.28     | 2.11     | 1.11     | 1.48   | 11.7     | 2.27     | 1.60     | 5.60     | 1.33     | 0.53     | 0.30     | 0.36    | 1.02   | 1.32   |
| La         | 13.5     | 9.3      | 12.5     | 9.92   | 6.03     | 1.51     | 9.52     | 1.54     | 1.67     | 11.2     | 12.5     | 42.4    | 12.0   | 5.99   |
| Ce         | 26.5     | 19.2     | 28.2     | 19.86  | 15.0     | 4.48     | 22.2     | 3.80     | 4.41     | 26.2     | 27.9     | 87.8    | 25.0   | 15.0   |
| Pr         | 3.27     | 2.43     | 3.56     | 2.46   | 2.10     | 0.67     | 2.78     | 0.51     | 0.63     | 3.30     | 3.41     | 10.5    | 2.87   | 2.31   |
| Nd         | 13.0     | 10.2     | 14.6     | 10.1   | 9.63     | 3.31     | 11.8     | 2.15     | 3.04     | 13.7     | 14.3     | 41.4    | 11.1   | 11.3   |
| Sm         | 2.68     | 2.04     | 3.92     | 2.08   | 2.24     | 0.95     | 2.56     | 0.48     | 0.66     | 2.92     | 3.12     | 8.53    | 2.34   | 2.90   |
| Eu         | 0.65     | 0.47     | 0.98     | 0.56   | 0.55     | 0.20     | 0.61     | 0.13     | 0.19     | 0.72     | 0.71     | 1.78    | 0.68   | 0.92   |
| Gd         | 2.96     | 2.15     | 4.26     | 2.25   | 2.79     | 1.16     | 2.86     | 0.60     | 0.81     | 2.98     | 3.15     | 7.76    | 2.31   | 3.24   |
| Tb         | 0.43     | 0.33     | 0.72     | 0.36   | 0.47     | 0.19     | 0.45     | 0.10     | 0.12     | 0.44     | 0.50     | 1.07    | 0.36   | 0.52   |
| Dy         | 2.67     | 1.90     | 4.46     | 2.10   | 3.34     | 1.33     | 2.93     | 0.73     | 0.83     | 2.41     | 2.91     | 5.75    | 2.27   | 3.23   |
| Ho         | 0.50     | 0.41     | 0.86     | 0.42   | 0.73     | 0.29     | 0.63     | 0.15     | 0.18     | 0.43     | 0.55     | 1.03    | 0.44   | 0.65   |
| Er         | 1.43     | 1.18     | 2.36     | 1.19   | 2.08     | 0.87     | 1.78     | 0.50     | 0.57     | 1.12     | 1.49     | 2.79    | 1.30   | 1.89   |
| Tm         | 0.19     | 0.16     | 0.32     | 0.15   | 0.30     | 0.13     | 0.24     | 0.08     | 0.09     | 0.15     | 0.19     | 0.37    | 0.20   | 0.27   |
| Yb         | 1.11     | 1.05     | 2.12     | 0.99   | 1.90     | 0.93     | 1.47     | 0.52     | 0.60     | 0.82     | 1.15     | 2.30    | 1.24   | 1.74   |
| Lu         | 0.16     | 0.16     | 0.26     | 0.13   | 0.27     | 0.14     | 0.21     | 0.08     | 0.09     | 0.11     | 0.15     | 0.32    | 0.19   | 0.26   |
| Ce/Ce*     | -0.070   | -0.058   | -0.027   | -0.064 | -0.011   | 0.028    | -0.016   | -0.008   | 0.003    | -0.016   | -0.026   | -0.048  | -0.041 | -0.023 |
| Eu/Eu*     | 0.353    | 0.342    | 0.365    | 0.397  | 0.333    | 0.294    | 0.343    | 0.370    | 0.396    | 0.372    | 0.341    | 0.329   | 0.445  | 0.459  |
